# Supplementary material for: Separation Methods of Phenolic Compounds from Plant Extract as Antioxidant Agents Candidate
Source: MDPI journal article supplement (doi:10.3390/plants13070965), 2024-03-27
Supplement: s1 [file s1]

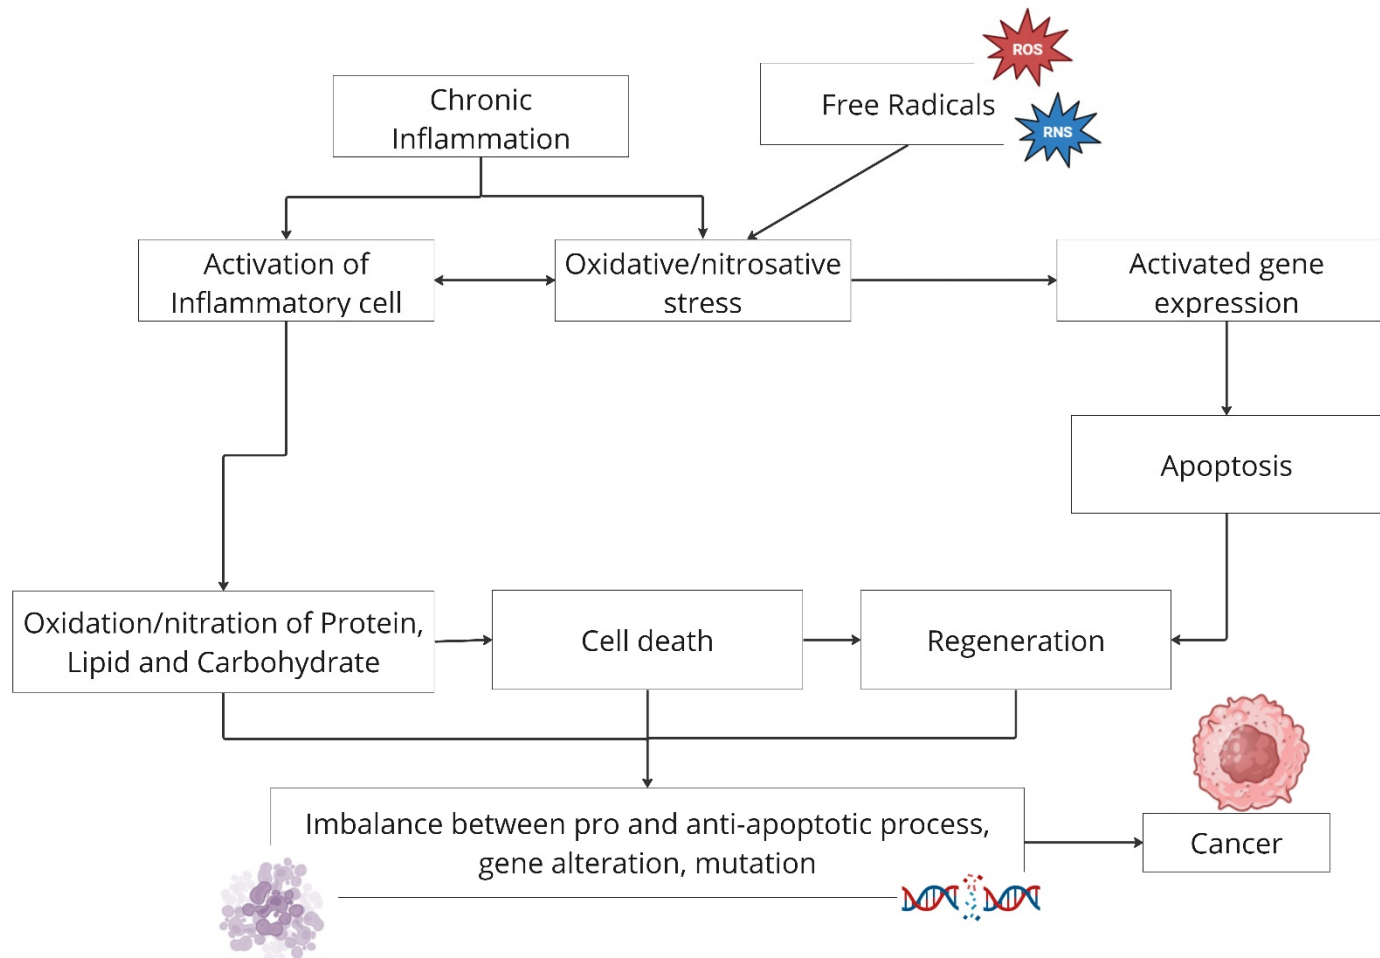

**Figure S1.** The mechanism linking inflammation to cancer.

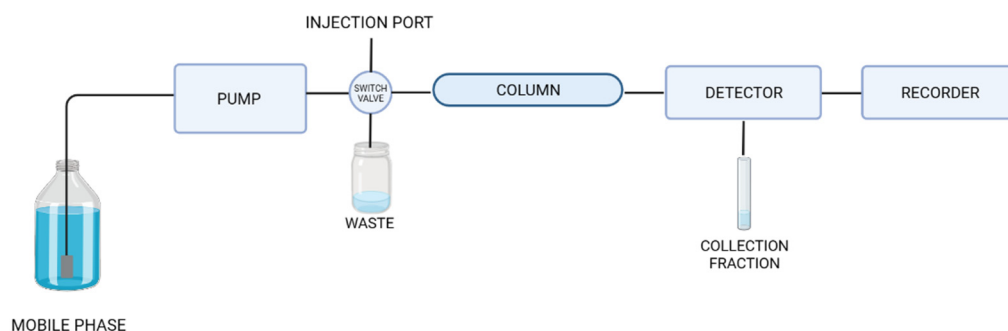

**Figure S2.** The Schematic of MPLC.

#### ISOLATION PROCESS 1

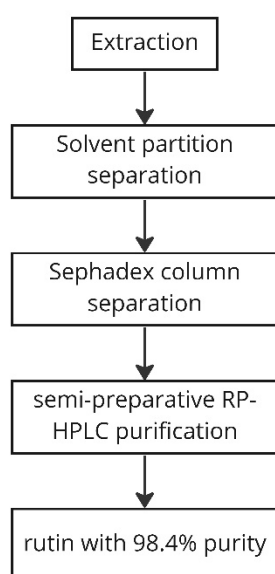

#### ISOLATION PROCESS 2

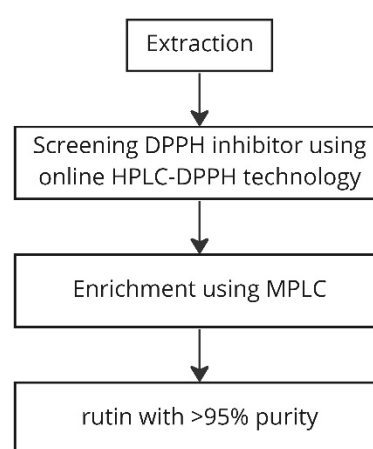

**Figure S3.** Two schemes of isolation process of rutin. DPPH, 1,1-diphenyl-2-picrylhydrazyl; MPLC, medium-pressure liquid chromatography; RP-HPLC, reverse-phase high-performance liquid chromatography.

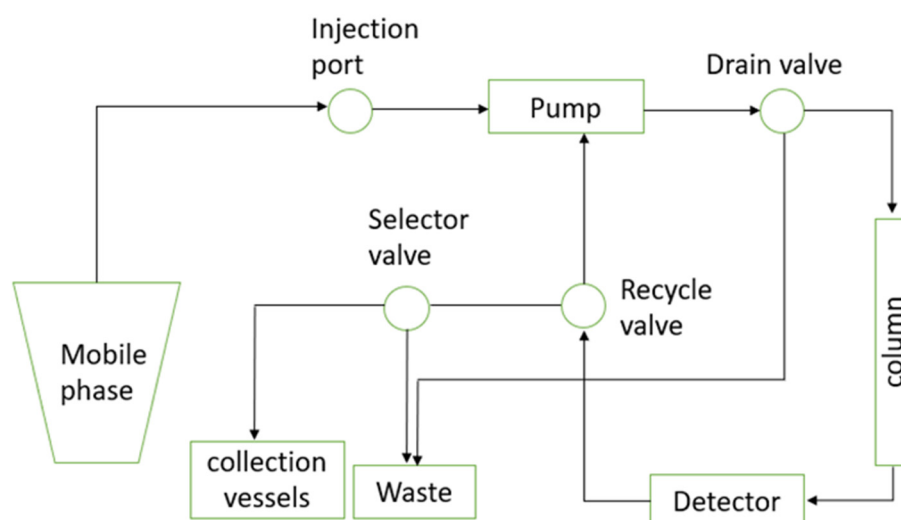

**Figure S4.** Instrumentation of closed loop recycle-HPLC.
